# Supplementary material for: Enhanced Cardiorenal Protective Effects of Combining SGLT2 Inhibition, Endothelin Receptor Antagonism and RAS Blockade in Type 2 Diabetic Mice
Source: MDPI journal article supplement (doi:10.3390/ijms232112823), 2022-10-24
Supplement: s1 [file s1]

# Supplemental Material

## **Enhanced cardiorenal protective effects of combining SGLT2 inhibition, endothelin receptor antagonism and RAS blockade in type 2 diabetic mice**

by

Ander Vergara<sup>1,2,\*</sup>, Conxita Jacobs-Cacha<sup>1,\*</sup>, Carmen Llorens-Cebria<sup>1</sup>, Alberto Ortiz<sup>3</sup>, Irene Martinez-Diaz<sup>1</sup>, Nerea Martos<sup>1</sup>, Pamela Dominguez Báez<sup>1</sup>, Mireia Molina Van den Bosch<sup>1</sup>, Sheila Bermejo<sup>1,2</sup>, Michael Paul Pieper<sup>4</sup>, Begoña Benito<sup>5,6,7,†</sup>, and Maria Jose Soler<sup>1,2,†</sup>.

<sup>1</sup>Nephrology and Kidney Transplantation Research Group. Vall d'Hebron Institut de Recerca (VHIR). Passeig Vall d'Hebron 119-129, 08035, Barcelona, Spain.

<sup>2</sup>Nephrology Department. Vall d'Hebron Hospital Universitari. Passeig Vall d'Hebron 119-129, 08035, Barcelona, Spain.

<sup>3</sup>IIS-Fundación Jiménez Díaz, Universidad Autónoma de Madrid, Fundación Renal Iñigo Álvarez de Toledo-IRSIN, REDinREN, Instituto de Investigación Carlos III. Av. de los Reyes Católicos 2, 28040, Madrid, Spain.

<sup>4</sup>Cardio-metabolic Diseases Research. Boehringer Ingelheim Pharma GmbH & Co KG. Birkendorfer Str. 65, 88397, Biberach an der Riß, Germany.

<sup>5</sup>Cardiology Research Group. Vall d'Hebron Institut de Recerca (VHIR), Vall d'Hebron Hospital Universitari, Vall d'Hebron Barcelona Hospital Campus. Passeig Vall d'Hebron 119-129, 08035, Barcelona, Spain.

<sup>6</sup>Cardiology Department. Vall d'Hebron Hospital Universitari. Passeig Vall d'Hebron 119-129, 08035, Barcelona, Spain.

<sup>7</sup>Department of Medicine. Universitat Autònoma de Barcelona. Av. de Can Domènech, 08193, Bellaterra, Spain.

\* These authors contributed equally to the work and share the first authorship.

† Senior and corresponding authors.

# TABLE OF CONTENTS

|                                                                                                                                                                                                                                                                                                                     |          |
|---------------------------------------------------------------------------------------------------------------------------------------------------------------------------------------------------------------------------------------------------------------------------------------------------------------------|----------|
| <b>TABLES .....</b>                                                                                                                                                                                                                                                                                                 | <b>4</b> |
| Table S1. Additional echocardiographic parameters of vehicle-treated db/m mice, vehicle-treated db/db mice and db/db mice treated with empagliflozin, atrasentan, ramipril or their combinations. ....                                                                                                              | 4        |
| Table S2. Primer sequences used for SYBR Green real-time quantitative PCR (RT-qPCR). ....                                                                                                                                                                                                                           | 5        |
| Table S3. Number of mice included and Tukey's outlier values in each of the measurements performed during the study. ....                                                                                                                                                                                           | 6        |
| <b>FIGURES .....</b>                                                                                                                                                                                                                                                                                                | <b>9</b> |
| Figure S1. Blood pressure before and after treatment in vehicle-treated db/m mice, vehicle-treated db/db mice and db/db mice treated with empagliflozin, atrasentan, ramipril or their combinations. ....                                                                                                           | 9        |
| Figure S2. Glomerular filtration rate before and after treatment in vehicle-treated db/m mice, vehicle-treated db/db mice and db/db mice treated with empagliflozin, atrasentan, ramipril or their combinations. ....                                                                                               | 10       |
| Figure S3. Water intake after treatment in vehicle-treated db/m mice, vehicle-treated db/db mice and db/db mice treated with empagliflozin, atrasentan, ramipril or their combinations. ....                                                                                                                        | 11       |
| Figure S4. Renal tubulointerstitial fibrosis measured by picosirius red staining in vehicle-treated db/m mice, vehicle-treated db/db mice and db/db mice treated with empagliflozin, atrasentan, ramipril or their combinations. ....                                                                               | 12       |
| Figure S5. Evaluation of renal mRNA expression and kidney and serum activity of angiotensin-converting enzyme (ACE) and angiotensin-converting enzyme 2 (ACE2) in vehicle-treated db/m mice, vehicle-treated db/db mice and db/db mice treated with empagliflozin, atrasentan, ramipril or their combinations. .... | 13       |
| Figure S6. Experimental design. ....                                                                                                                                                                                                                                                                                | 14       |
| Figure S7. Mice death or excluded during the experimental procedure. ....                                                                                                                                                                                                                                           | 15       |



## TABLES

**Table S1.** Additional echocardiographic parameters of vehicle-treated db/m mice, vehicle-treated db/db mice and db/db mice treated with empagliflozin, atrasentan, ramipril or their combinations.

|                                      | db/m                | db/db                            | db/db<br>EMP         | db/db<br>EMP+RAM     | db/db<br>EMP+RAM+ATR | db/db<br>ATR        | db/db<br>ATR+RAM     | db/db<br>RAM         |
|--------------------------------------|---------------------|----------------------------------|----------------------|----------------------|----------------------|---------------------|----------------------|----------------------|
| <b>Aortic diameter<br/>(mm)</b>      | 1.50<br>(1.44-1.55) | 1.52<br>(1.38-1.68)              | 1.48<br>(1.44-1.66)  | 1.40*<br>(1.35-1.42) | 1.35*<br>(1.34-1.46) | 1.38<br>(1.35-1.50) | 1.54<br>(1.42-1.61)  | 1.48<br>(1.43-1.51)  |
| <b>LVPW thickness<br/>(mm)</b>       | 0.97<br>(0.91-0.98) | 0.99<br>(0.87-1.10)              | 0.87*<br>(0.85-0.96) | 0.89*<br>(0.84-0.93) | 1.03<br>(0.87-1.06)  | 0.91<br>(0.80-0.95) | 0.89*<br>(0.77-0.92) | 0.96<br>(0.92-1.03)  |
| <b>Fractional<br/>shortening (%)</b> | 35.5<br>(33.8-38.7) | 36.3<br>(35.0-37.0)              | 38.0<br>(34.3-40.0)  | 37.9<br>(35.6-42.0)  | 38.6<br>(35.0-40.8)  | 34.7<br>(32.8-36.0) | 39.9*<br>(35.6-40.9) | 36.7<br>(36.3-39.0)  |
| <b>E/A ratio</b>                     | 2.40<br>(2.29-2.52) | 1.99 <sup>s</sup><br>(1.92-2.14) | 2.08<br>(1.38-3.07)  | 0.93*<br>(0.48-1.63) | 1.44<br>(1.00-1.93)  | 1.99<br>(1.84-2.19) | 0.86*<br>(0.60-1.68) | 1.51*<br>(0.61-2.08) |

**LVPW:** left ventricle posterior wall. **db/m:** non-diabetic mice treated with vehicle. **db/db:** diabetic mice treated with vehicle. **db/db EMP:** diabetic mice treated with empagliflozin. **db/db EMP+RAM:** diabetic mice treated with empagliflozin and ramipril. **db/db EMP+RAM+ATR:** diabetic mice treated with empagliflozin, ramipril and atrasentan. **db/db ATR:** diabetic mice treated with atrasentan. **db/db ATR+RAM:** diabetic mice treated with atrasentan and ramipril. **db/db RAM:** diabetic mice treated with ramipril. Values are shown as median and interquartile range (Q1-Q3). <sup>s</sup> $p < 0.05$  vehicle-treated db/db mice vs vehicle-treated db/m mice.

\* $p < 0.05$  any treated db/db mice compared with vehicle-treated db/db mice.

**Table S2.** Primer sequences used for SYBR Green real-time quantitative PCR (RT-qPCR). The present table displays protein and gene names for each of the genes analyzed, the forward and reverse primer sequence, as well as the dilution employed in each case.

| Protein                                        | Gene   | Forward primer (5'-3')  | Reverse primer (5'-3')  | cDNA dilution |
|------------------------------------------------|--------|-------------------------|-------------------------|---------------|
| Angiotensin converting enzyme                  | Ace    | CGCCGCTATGGGGACAAATA    | ATGTCTCCCAGCAAATGGGC    | 1/25          |
| Angiotensin converting enzyme 2                | Ace2   | CGCAGAGATCAAGCCATTGT    | TCCATCAACTTCCTCCTCACA   | 1/25          |
| Angiotensinogen                                | Agt    | CGTGCCCTAGGTGAGAGAG     | TCCAAGTCAGGAGGTCGTTC    | 1/25          |
| Collagen I alpha-1 chain                       | Col1a1 | GAGCGGAGAGTACTGGATCG    | GTTCCGGCTGATGTACCAGT    | 1/50          |
| Hypoxanthine-guanine phosphoribosyltransferase | Hprt1  | TGTTGTGGATATGCCCTTG     | AATGACACAAACGTGATTCAA   | 1/25          |
| $\alpha$ -Myosin heavy chain                   | Myh6   | CCAACACCAACCTGTCCAAGT   | AGAGGTTATTCCTCGTCGTGCAT | 1/50          |
| $\beta$ -Myosin heavy chain                    | Myh7   | CTCAAGCTGCTCAGCAATCTATT | GGAGCGCAAGTTTGTCATAAGT  | 1/50          |
| NADPH oxidase 4                                | Nox4   | CTTGGTGAATGCCCTCAACT    | TTCTGGGATCCTCATTCTGG    | 1/100         |
| Renin                                          | Ren1   | ACCTTGCTTGTGGATTAC      | CCTGATCCGTAGTGGATGGT    | 1/25          |

**Table S3.** Number of mice included and Tukey's outlier values in each of the measurements performed during the study.

|                                   | db/m | db/db | db/db<br>EMP | db/db<br>EMP+RAM | db/db<br>EMP+RAM+ATR | db/db<br>ATR | db/db<br>ATR+RAM | db/db RAM |
|-----------------------------------|------|-------|--------------|------------------|----------------------|--------------|------------------|-----------|
| <b>Body weight</b>                |      |       |              |                  |                      |              |                  |           |
| Animals included                  | 12   | 15    | 14           | 15               | 15                   | 8            | 13               | 9         |
| Outliers                          | -    | -     | -            | -                | -                    | -            | -                | 1         |
| <b>Blood glucose</b>              |      |       |              |                  |                      |              |                  |           |
| Animals included                  | 12   | 15    | 14           | 15               | 15                   | 8            | 13               | 9         |
| Outliers                          | -    | 1     | 4            | -                | -                    | 1            | 2                | 1         |
| <b>Body fat</b>                   |      |       |              |                  |                      |              |                  |           |
| Animals included                  | 12   | 15    | 14           | 15               | 15                   | 8            | 13               | 9         |
| Outliers                          | -    | -     | -            | -                | -                    | -            | 1                | -         |
| <b>Subcutaneous fat</b>           |      |       |              |                  |                      |              |                  |           |
| Animals included                  | 12   | 15    | 14           | 15               | 15                   | 8            | 13               | 9         |
| Outliers                          | -    | 1     | -            | -                | -                    | -            | 1                | -         |
| <b>Intraabdominal fat</b>         |      |       |              |                  |                      |              |                  |           |
| Animals included                  | 12   | 15    | 14           | 15               | 15                   | 8            | 13               | 9         |
| Outliers                          | -    | -     | -            | -                | -                    | -            | -                | -         |
| <b>Blood glucose</b>              |      |       |              |                  |                      |              |                  |           |
| Animals included                  | 12   | 15    | 14           | 15               | 15                   | 8            | 13               | 9         |
| Outliers                          | -    | 1     | 4            | -                | -                    | 1            | 2                | 1         |
| <b>Systolic BP pre</b>            |      |       |              |                  |                      |              |                  |           |
| Animals included                  | 12   | 15    | 14           | 15               | 14                   | 8            | 13               | 9         |
| Outliers                          | -    | -     | -            | -                | -                    | -            | 1                | -         |
| <b>Diastolic BP pre</b>           |      |       |              |                  |                      |              |                  |           |
| Animals included                  | 12   | 15    | 14           | 15               | 14                   | 8            | 13               | 9         |
| Outliers                          | -    | -     | 1            | -                | -                    | -            | -                | -         |
| <b>Systolic BP post</b>           |      |       |              |                  |                      |              |                  |           |
| Animals included                  | 12   | 15    | 14           | 15               | 14                   | 8            | 10               | 9         |
| Outliers                          | -    | -     | -            | -                | 1                    | -            | -                | -         |
| <b>Diastolic BP post</b>          |      |       |              |                  |                      |              |                  |           |
| Animals included                  | 12   | 15    | 14           | 15               | 14                   | 8            | 10               | 9         |
| Outliers                          | -    | -     | -            | -                | -                    | -            | -                | -         |
| <b>Heart rate post</b>            |      |       |              |                  |                      |              |                  |           |
| Animals included                  | 12   | 15    | 14           | 15               | 14                   | 8            | 10               | 9         |
| Outliers                          | -    | 2     | -            | -                | -                    | -            | -                | -         |
| <b>GFR pre</b>                    |      |       |              |                  |                      |              |                  |           |
| Animals included                  | 12   | 15    | 14           | 14               | 15                   | 8            | 13               | 9         |
| Outliers                          | -    | -     | -            | 1                | -                    | -            | -                | -         |
| <b>GFR post</b>                   |      |       |              |                  |                      |              |                  |           |
| Animals included                  | 9    | 12    | 8            | 9                | 9                    | 6            | 8                | 7         |
| Outliers                          | 2    | -     | -            | -                | -                    | -            | -                | -         |
| <b>GFR difference</b>             |      |       |              |                  |                      |              |                  |           |
| Animals included                  | 9    | 12    | 8            | 9                | 9                    | 6            | 8                | 7         |
| Outliers                          | -    | 1     | 1            | -                | -                    | 1            | -                | -         |
| <b>UACR</b>                       |      |       |              |                  |                      |              |                  |           |
| Animals included                  | 11   | 14    | 14           | 15               | 15                   | 8            | 13               | 9         |
| Outliers                          | 1    | 1     | 2            | -                | -                    | 1            | 1                | -         |
| <b>Urine/Plasma glucose</b>       |      |       |              |                  |                      |              |                  |           |
| Animals included                  | 10   | 10    | 11           | 11               | 11                   | 8            | 10               | 8         |
| Outliers                          | 1    | -     | -            | -                | 1                    | -            | -                | 2         |
| <b>Water intake</b>               |      |       |              |                  |                      |              |                  |           |
| Animals included                  | 12   | 15    | 14           | 15               | 15                   | 8            | 13               | 9         |
| Outliers                          | 1    | 1     | -            | -                | 1                    | -            | -                | 1         |
| <b>Mesangial matrix expansion</b> |      |       |              |                  |                      |              |                  |           |
| Animals included                  | 11   | 11    | 11           | 11               | 11                   | 8            | 9                | 8         |
| Outliers                          | -    | 2     | -            | -                | -                    | -            | -                | -         |
| <b>Podocyte density</b>           |      |       |              |                  |                      |              |                  |           |
| Animals included                  | 10   | 11    | 10           | 11               | 10                   | 7            | 9                | 7         |
| Outliers                          | -    | -     | -            | -                | -                    | -            | -                | -         |
| <b>Kidney PSR</b>                 |      |       |              |                  |                      |              |                  |           |
| Animals included                  | 9    | 11    | 11           | 10               | 12                   | 8            | 9                | 9         |
| Outliers                          | -    | -     | -            | -                | -                    | -            | -                | -         |

|                                                       |    |    |    |    |    |   |    |   |
|-------------------------------------------------------|----|----|----|----|----|---|----|---|
| <b>LA diameter</b>                                    |    |    |    |    |    |   |    |   |
| Animals included                                      | 9  | 10 | 6  | 8  | 9  | 6 | 7  | 7 |
| Outliers                                              | 1  | -  | -  | -  | -  | - | -  | - |
| <b>LVEDD</b>                                          |    |    |    |    |    |   |    |   |
| Animals included                                      | 9  | 10 | 6  | 8  | 9  | 6 | 7  | 7 |
| Outliers                                              | -  | -  | -  | -  | -  | - | -  | - |
| <b>LVESD</b>                                          |    |    |    |    |    |   |    |   |
| Animals included                                      | 9  | 10 | 6  | 8  | 9  | 6 | 7  | 7 |
| Outliers                                              | 1  | -  | -  | -  | 2  | - | -  | - |
| <b>IVS thickness</b>                                  |    |    |    |    |    |   |    |   |
| Animals included                                      | 9  | 10 | 6  | 8  | 9  | 6 | 7  | 7 |
| Outliers                                              | 1  | -  | -  | -  | 2  | - | -  | - |
| <b>Ejection fraction</b>                              |    |    |    |    |    |   |    |   |
| Animals included                                      | 9  | 10 | 6  | 8  | 9  | 6 | 7  | 7 |
| Outliers                                              | -  | -  | -  | -  | -  | 1 | -  | - |
| <b>IVRT</b>                                           |    |    |    |    |    |   |    |   |
| Animals included                                      | 9  | 10 | 6  | 8  | 9  | 6 | 7  | 7 |
| Outliers                                              | -  | -  | 1  | -  | -  | - | -  | - |
| <b>Myocyte area</b>                                   |    |    |    |    |    |   |    |   |
| Animals included                                      | 11 | 11 | 10 | 10 | 11 | 7 | 8  | 9 |
| Outliers                                              | 1  | -  | 3  | -  | -  | - | -  | - |
| <b>Heart PSR</b>                                      |    |    |    |    |    |   |    |   |
| Animals included                                      | 11 | 11 | 9  | 8  | 8  | 7 | 8  | 7 |
| Outliers                                              | -  | 1  | 1  | -  | -  | 1 | 1  | 1 |
| <b>Collagen I mRNA</b>                                |    |    |    |    |    |   |    |   |
| Animals included                                      | 12 | 11 | 11 | 11 | 12 | 8 | 10 | 9 |
| Outliers                                              | 1  | -  | 1  | -  | -  | 1 | -  | 2 |
| <b><math>\alpha</math>-MHC mRNA</b>                   |    |    |    |    |    |   |    |   |
| Animals included                                      | 12 | 11 | 11 | 11 | 12 | 8 | 10 | 9 |
| Outliers                                              | 2  | 1  | -  | -  | -  | - | -  | - |
| <b><math>\beta</math>-MHC mRNA</b>                    |    |    |    |    |    |   |    |   |
| Animals included                                      | 12 | 11 | 11 | 11 | 12 | 8 | 10 | 9 |
| Outliers                                              | -  | -  | -  | 1  | -  | - | -  | - |
| <b><math>\alpha</math>-MHC/<math>\beta</math>-MHC</b> |    |    |    |    |    |   |    |   |
| Animals included                                      | 12 | 11 | 11 | 11 | 12 | 8 | 10 | 9 |
| Outliers                                              | 1  | -  | 1  | -  | 1  | 1 | 1  | 1 |
| <b>AGT mRNA</b>                                       |    |    |    |    |    |   |    |   |
| Animals included                                      | 12 | 11 | 11 | 11 | 12 | 8 | 10 | 9 |
| Outliers                                              | 1  | -  | -  | -  | 1  | - | -  | - |
| <b>Urine AGT/Creatinine</b>                           |    |    |    |    |    |   |    |   |
| Animals included                                      | 5  | 8  | 11 | 10 | 10 | 8 | 10 | 7 |
| Outliers                                              | 1  | 1  | 1  | 1  | -  | - | 2  | - |
| <b>Serum AGT</b>                                      |    |    |    |    |    |   |    |   |
| Animals included                                      | 12 | 10 | 11 | 11 | 12 | 8 | 10 | 9 |
| Outliers                                              | -  | -  | -  | -  | -  | - | -  | - |
| <b>Renin mRNA</b>                                     |    |    |    |    |    |   |    |   |
| Animals included                                      | 12 | 11 | 11 | 11 | 12 | 8 | 10 | 9 |
| Outliers                                              | -  | -  | -  | -  | -  | 1 | -  | 2 |
| <b>Renin staining</b>                                 |    |    |    |    |    |   |    |   |
| Animals included                                      | 9  | 9  | 8  | 9  | 9  | 8 | 5  | 7 |
| Outliers                                              | -  | -  | -  | 1  | -  | 1 | -  | - |
| <b>ACE mRNA</b>                                       |    |    |    |    |    |   |    |   |
| Animals included                                      | 12 | 11 | 11 | 11 | 12 | 8 | 10 | 9 |
| Outliers                                              | 1  | -  | 1  | 1  | 1  | - | 1  | 1 |
| <b>ACE2 mRNA</b>                                      |    |    |    |    |    |   |    |   |
| Animals included                                      | 12 | 11 | 11 | 11 | 11 | 8 | 10 | 9 |
| Outliers                                              | 1  | -  | 1  | -  | -  | - | 2  | - |
| <b>ACE2/ACE mRNA</b>                                  |    |    |    |    |    |   |    |   |
| Animals included                                      | 12 | 11 | 11 | 11 | 11 | 8 | 10 | 9 |
| Outliers                                              | 1  | 1  | -  | -  | -  | - | -  | - |
| <b>ACE act. kidney</b>                                |    |    |    |    |    |   |    |   |
| Animals included                                      | 12 | 11 | 10 | 11 | 12 | 8 | 10 | 9 |
| Outliers                                              | -  | 1  | -  | -  | -  | - | 1  | - |

|                            |    |    |    |    |    |   |    |   |
|----------------------------|----|----|----|----|----|---|----|---|
| <b>ACE2 act. kidney</b>    |    |    |    |    |    |   |    |   |
| Animals included           | 12 | 11 | 10 | 11 | 12 | 8 | 10 | 9 |
| Outliers                   | -  | -  | -  | -  | 1  | 1 | -  | 1 |
| <b>ACE2/ACE act. ki.</b>   |    |    |    |    |    |   |    |   |
| Animals included           | 12 | 11 | 10 | 11 | 12 | 8 | 10 | 9 |
| Outliers                   | -  | -  | -  | -  | -  | - | -  | 2 |
| <b>ACE act. serum</b>      |    |    |    |    |    |   |    |   |
| Animals included           | 12 | 11 | 11 | 11 | 11 | 8 | 10 | 8 |
| Outliers                   | 1  | -  | -  | -  | 2  | - | 1  | - |
| <b>ACE2 act. serum</b>     |    |    |    |    |    |   |    |   |
| Animals included           | 12 | 11 | 11 | 11 | 12 | 8 | 10 | 8 |
| Outliers                   | -  | -  | -  | 1  | -  | 1 | -  | - |
| <b>ACE2/ACE act. serum</b> |    |    |    |    |    |   |    |   |
| Animals included           | 12 | 11 | 11 | 11 | 11 | 8 | 10 | 8 |
| Outliers                   | -  | -  | -  | -  | 1  | 2 | -  | - |

**BP:** blood pressure. **GFR:** glomerular filtration rate. **UACR:** urine albumin-to-creatinine ratio. **PSR:** picrosirius red staining. **LA:** left atrium. **LVEDD:** left ventricle end-diastolic diameter. **LVESD:** left ventricle end-systolic diameter. **IVS:** interventricular septum. **IVRT:** isovolumetric relaxation time. **MHC:** myosin heavy chain. **AGT:** angiotensinogen. **ACE:** angiotensin-converting enzyme. **ACE2:** angiotensin-converting enzyme 2.



## FIGURES

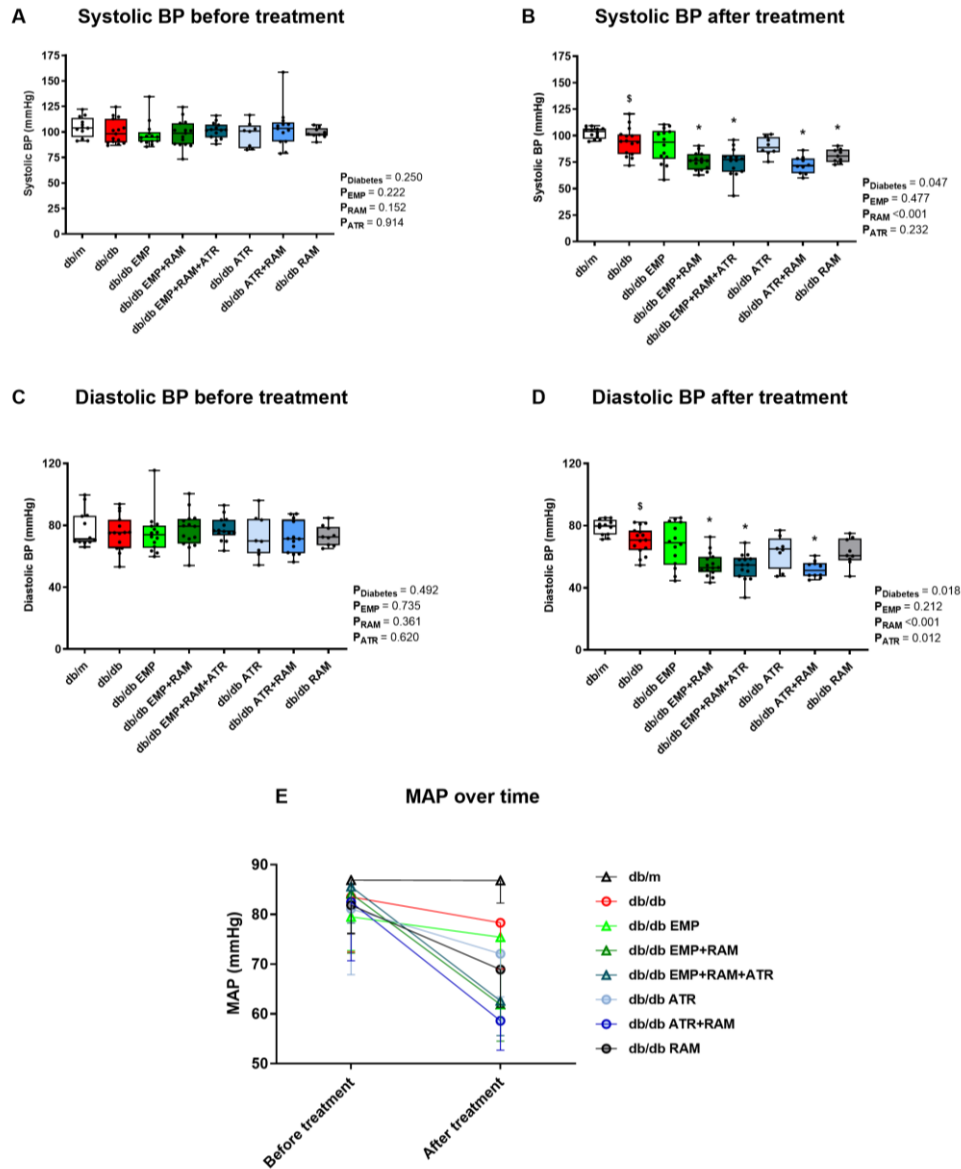

**Figure S1. Blood pressure before and after treatment in vehicle-treated db/m mice, vehicle-treated db/db mice and db/db mice treated with empagliflozin, atrasentan, ramipril or their combinations.**

Blood pressure was measured in mmHg. (A) systolic BP before initiating treatment. (B) systolic BP after treatment. (C) diastolic BP before initiating treatment. (D) diastolic BP after treatment. (E) Mean arterial pressure (MAP) before and after treatment. **db/m**: non-diabetic mice treated with vehicle. **db/db**: diabetic mice treated with vehicle. **db/db EMP**: diabetic mice treated with empagliflozin. **db/db EMP+RAM**: diabetic mice treated with empagliflozin and ramipril. **db/db EMP+RAM+ATR**: diabetic mice treated with empagliflozin, ramipril and atrasentan. **db/db ATR**: diabetic mice treated with atrasentan. **db/db ATR+RAM**: diabetic mice treated with atrasentan and ramipril. **db/db RAM**: diabetic mice treated with ramipril. Factorial ANOVA main effect results are displayed next to the graph.  $P_{\text{Diabetes}}$ : diabetes' main effect.  $P_{\text{EMP}}$ : empagliflozin's main effect.  $P_{\text{RAM}}$ : ramipril's main effect.  $P_{\text{ATR}}$ : atrasentan's main effect.  $*p < 0.05$  vehicle-treated db/db mice vs vehicle-treated db/m mice.  $*p < 0.05$  any treated db/db mice compared with vehicle-treated db/db mice.

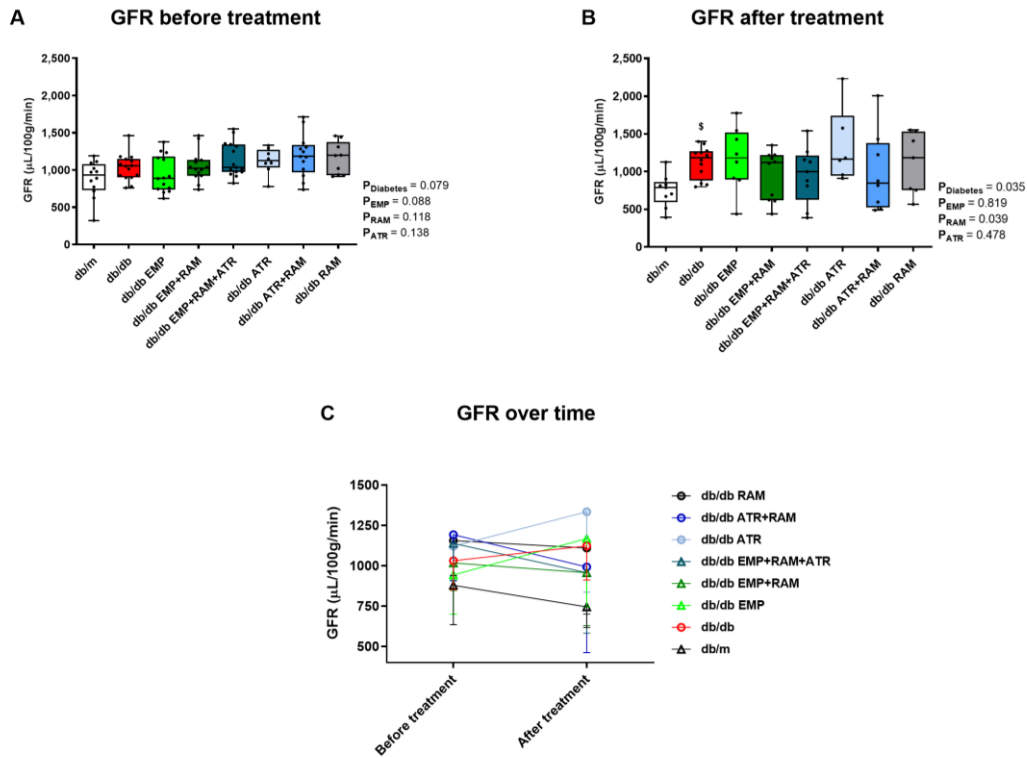

**Figure S2. Glomerular filtration rate before and after treatment in vehicle-treated db/m mice, vehicle-treated db/db mice and db/db mice treated with empagliflozin, atrasentan, ramipril or their combinations.**

Glomerular filtration rate (GFR) was measured in  $\mu\text{L}/100\text{g}/\text{min}$ . (A) GFR before initiating treatment. (B) GFR after treatment. (C) GFR change and slope after 8 weeks of treatment. **db/m**: non-diabetic mice treated with vehicle. **db/db**: diabetic mice treated with vehicle. **db/db EMP**: diabetic mice treated with empagliflozin. **db/db EMP+RAM**: diabetic mice treated with empagliflozin and ramipril. **db/db EMP+RAM+ATR**: diabetic mice treated with empagliflozin, ramipril and atrasentan. **db/db ATR**: diabetic mice treated with atrasentan. **db/db ATR+RAM**: diabetic mice treated with atrasentan and ramipril. **db/db RAM**: diabetic mice treated with ramipril. Factorial ANOVA main effect results are displayed next to the graph.  $P_{\text{Diabetes}}$ : diabetes' main effect.  $P_{\text{EMP}}$ : empagliflozin's main effect.  $P_{\text{RAM}}$ : ramipril's main effect.  $P_{\text{ATR}}$ : atrasentan's main effect.  $^{\$}p < 0.05$  vehicle-treated db/db mice vs vehicle-treated db/m mice.

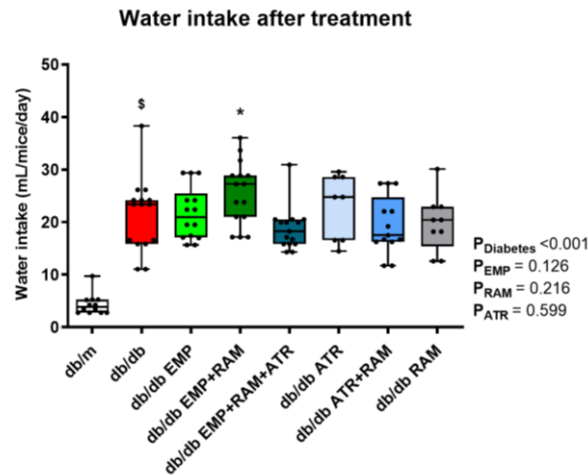

**Figure S3. Water intake after treatment in vehicle-treated db/m mice, vehicle-treated db/db mice and db/db mice treated with empagliflozin, atrasentan, ramipril or their combinations.** Water intake after treatment measured in mL/mice/day. As expected db/db mice showed increased water intake but it was similar among the seven db/db groups. **db/m**: non-diabetic mice treated with vehicle. **db/db**: diabetic mice treated with vehicle. **db/db EMP**: diabetic mice treated with empagliflozin. **db/db EMP+RAM**: diabetic mice treated with empagliflozin and ramipril. **db/db EMP+RAM+ATR**: diabetic mice treated with empagliflozin, ramipril and atrasentan. **db/db ATR**: diabetic mice treated with atrasentan. **db/db ATR+RAM**: diabetic mice treated with atrasentan and ramipril. **db/db RAM**: diabetic mice treated with ramipril. Factorial ANOVA main effect results are displayed next to the graph.  $P_{\text{Diabetes}}$ : diabetes' main effect.  $P_{\text{EMP}}$ : empagliflozin's main effect.  $P_{\text{RAM}}$ : ramipril's main effect.  $P_{\text{ATR}}$ : atrasentan's main effect.  $\$p < 0.05$  vehicle-treated db/db mice vs vehicle-treated db/m mice.  $*p < 0.05$  any treated db/db mice compared with vehicle-treated db/db mice.

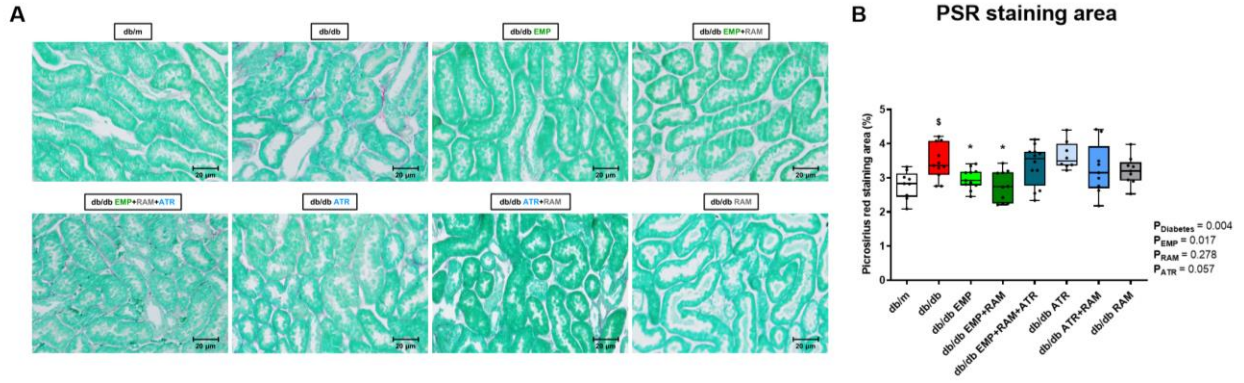

**Figure S4. Renal tubulointerstitial fibrosis measured by picosirius red staining in vehicle-treated db/m mice, vehicle-treated db/db mice and db/db mice treated with empagliflozin, atrasentan, ramipril or their combinations.**

(A) representative 400x magnification images of renal tubules stained with picosirius red (PSR). (B) Interstitial PSR quantification. **db/m**: non-diabetic mice treated with vehicle. **db/db**: diabetic mice treated with vehicle. **db/db EMP**: diabetic mice treated with empagliflozin. **db/db EMP+RAM**: diabetic mice treated with empagliflozin and ramipril. **db/db EMP+RAM+ATR**: diabetic mice treated with empagliflozin, ramipril and atrasentan. **db/db ATR**: diabetic mice treated with atrasentan. **db/db ATR+RAM**: diabetic mice treated with atrasentan and ramipril. **db/db RAM**: diabetic mice treated with ramipril. Factorial ANOVA main effect results are displayed next to the graph.  $P_{\text{Diabetes}}$ : diabetes' main effect.  $P_{\text{EMP}}$ : empagliflozin's main effect.  $P_{\text{RAM}}$ : ramipril's main effect.  $P_{\text{ATR}}$ : atrasentan's main effect.  $^s p < 0.05$  vehicle-treated db/db mice vs vehicle-treated db/m mice.  $^* p < 0.05$  any treated db/db mice compared with vehicle-treated db/db mice.

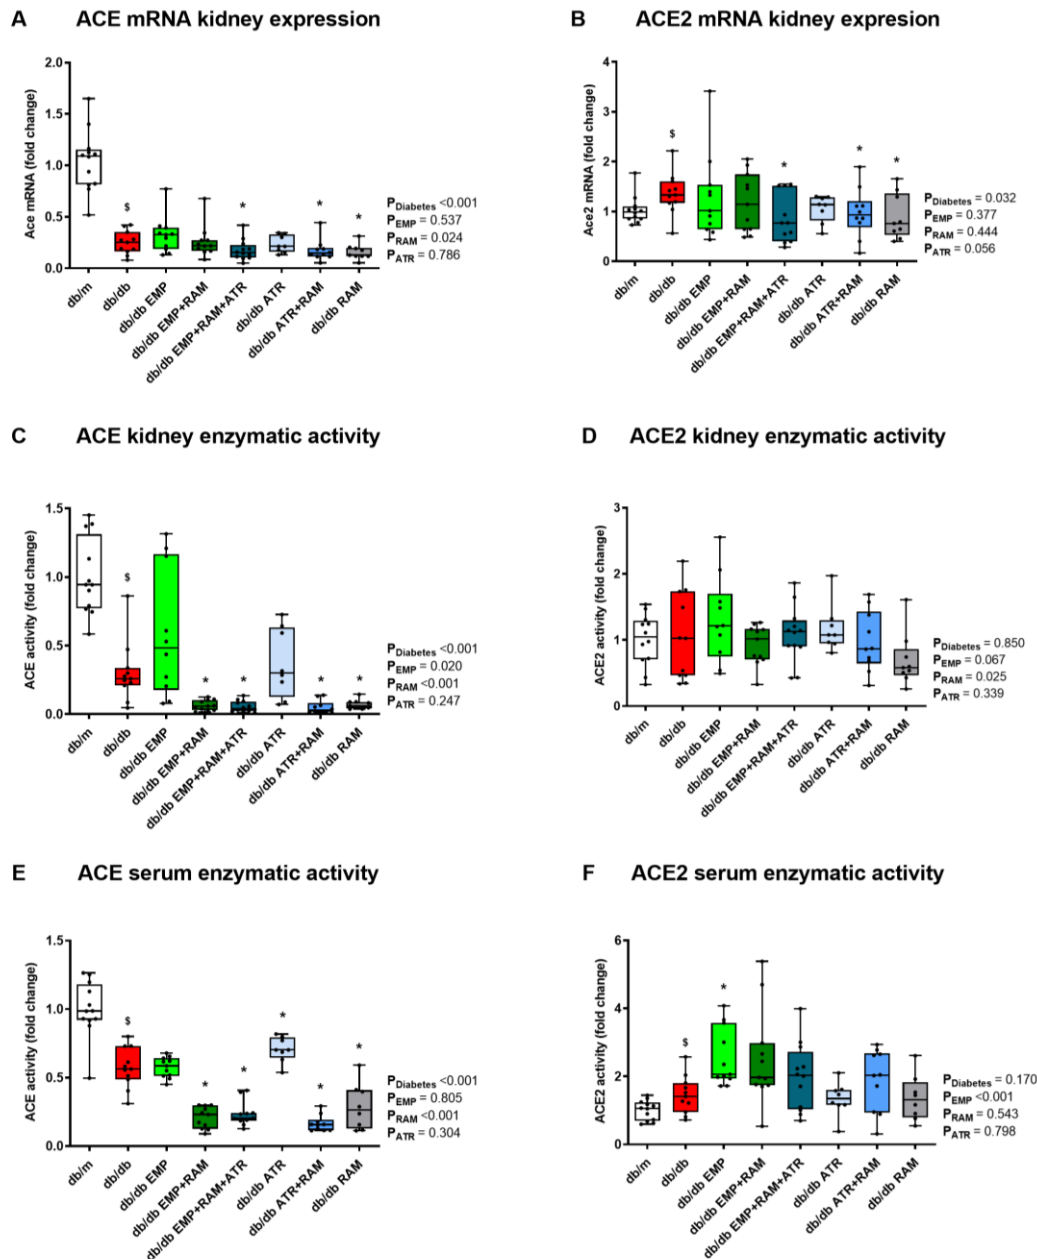

**Figure S5. Evaluation of renal mRNA expression and kidney and serum activity of angiotensin-converting enzyme (ACE) and angiotensin-converting enzyme 2 (ACE2) in vehicle-treated db/m mice, vehicle-treated db/db mice and db/db mice treated with empagliflozin, atrasentan, ramipril or their combinations.**

(A) ACE renal mRNA expression adjusted to db/m mice. (B) ACE2 renal mRNA expression adjusted to db/m mice. (C) ACE kidney activity adjusted to db/m mice. (D) ACE2 kidney activity adjusted to db/m mice. (E) ACE serum activity adjusted to db/m mice. (F) ACE2 serum activity adjusted to db/m mice. **db/m**: non-diabetic mice treated with vehicle. **db/db**: diabetic mice treated with vehicle. **db/db EMP**: diabetic mice treated with empagliflozin. **db/db EMP+RAM**: diabetic mice treated with empagliflozin and ramipril. **db/db EMP+RAM+ATR**: diabetic mice treated with empagliflozin, ramipril and atrasentan. **db/db ATR**: diabetic mice treated with atrasentan. **db/db ATR+RAM**: diabetic mice treated with atrasentan and ramipril. **db/db RAM**: diabetic mice treated with ramipril. Factorial ANOVA main effect results are displayed next to the graph.  $P_{\text{Diabetes}}$ : diabetes' main effect.  $P_{\text{EMP}}$ : empagliflozin's main effect.  $P_{\text{RAM}}$ : ramipril's main effect.  $P_{\text{ATR}}$ : atrasentan's main effect.  $^{\$}p < 0.05$  vehicle-treated db/db mice vs vehicle-treated db/m mice.  $^*p < 0.05$  any treated db/db mice compared with vehicle-treated db/db mice.

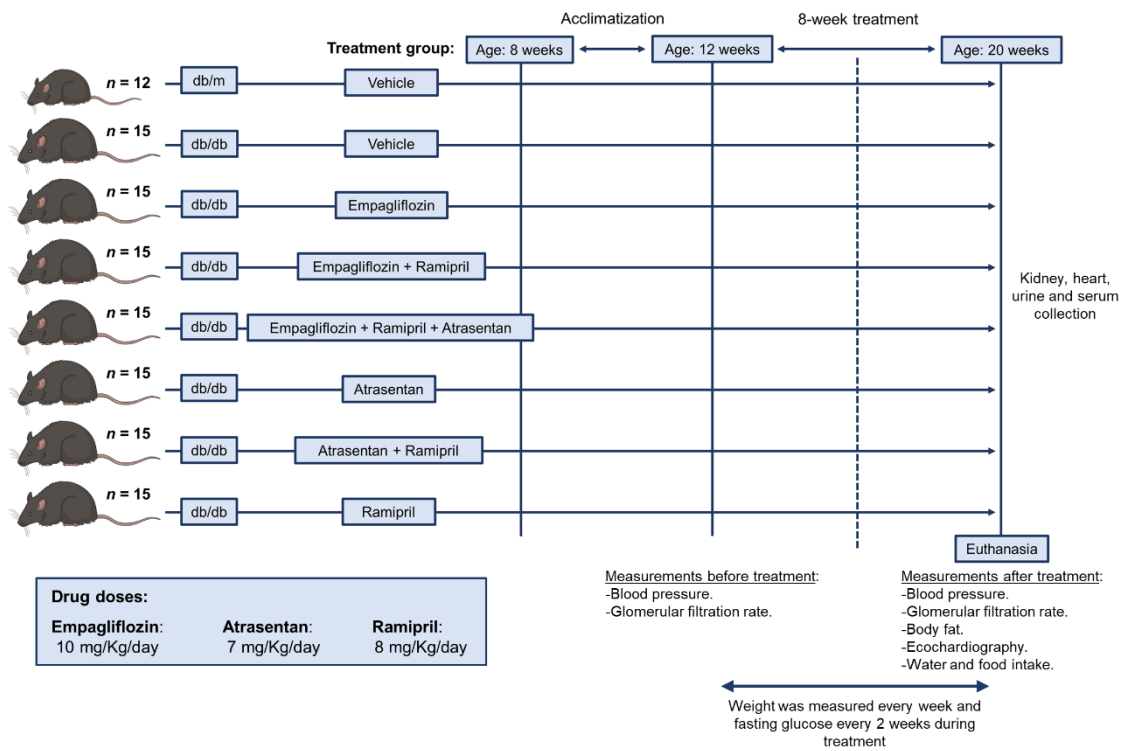

**Figure S6. Experimental design.**

Scheme of the experimental design of the study which details the time at which treatment was started and ended, as well as the number of mice initially allocated to each of the treatment branches, the measurements performed during the study and the samples collected after mice euthanasia.

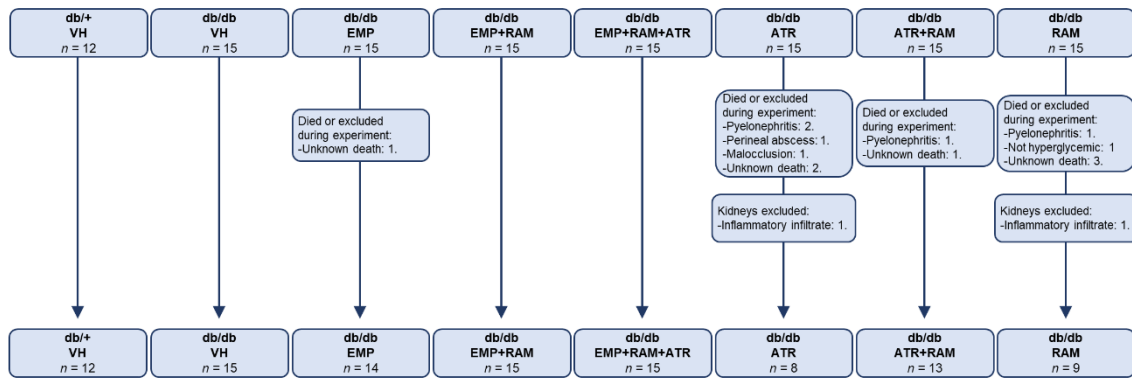

**Figure S7. Mice death or excluded during the experimental procedure.**

Scheme of the mice included in each group at the beginning of the experiment and the reasons why mice died or were excluded during the conduct of the study.
